# Supplementary material for: Improvements to the HITS-CLIP protocol eliminate widespread mispriming artifacts
Source: PubMed Central journal article supplement (PMC4858895; doi:10.1186/s12864-016-2675-5), 2016-05-05

3' Adaptor Over/Underrepresentation

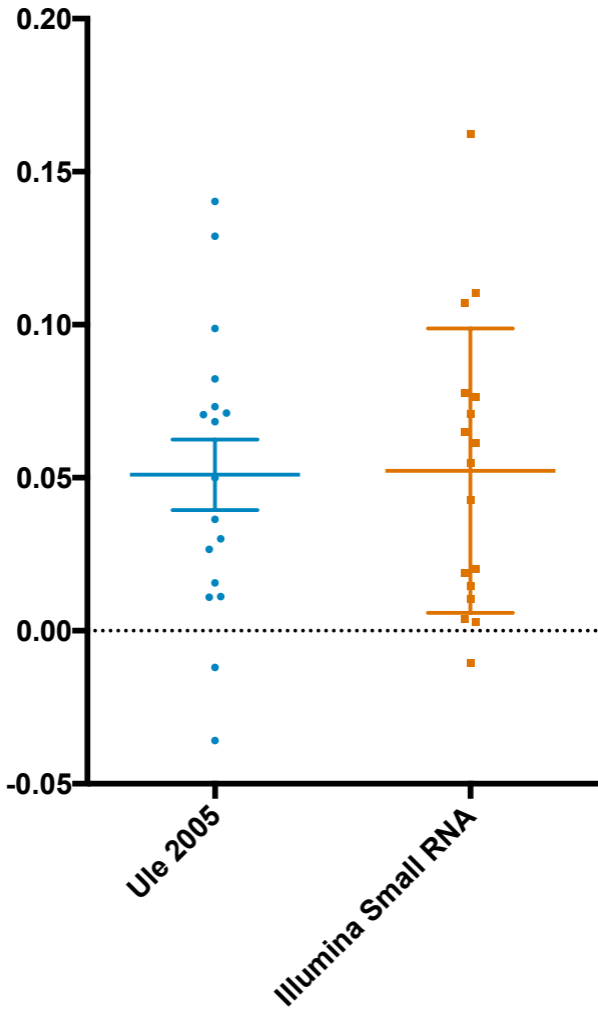

Supplement: 12864_2016_2675_MOESM1_ESM.pdf [file 12864_2016_2675_MOESM1_ESM.pdf]
